# Supplementary material for: PDGFRβ translocates to the nucleus and regulates chromatin remodeling via TATA element–modifying factor 1
Source: PubMed Central journal article supplement — J Cell Biol. 2018 May 7;217(5):1701–17. doi: 10.1083/jcb.201706118 (PMC5940298; doi:10.1083/jcb.201706118), 2018-05-07
Supplement: JCB_201706118_sm.pdf [file JCB_201706118_sm.pdf]

## Supplemental material

Papadopoulos et al., <https://doi.org/10.1083/jcb.201706118>

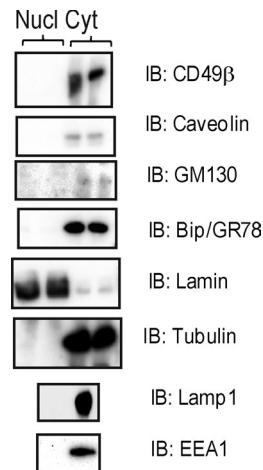

Figure S1. **Control of the purity of nuclear and cytoplasmic fractions.** The purity of nuclear (first and second lanes, denoted “Nucl”) and cytoplasmic fractions (third and fourth lanes, denoted “Cyt”) was determined by immunoblotting for CD49 $\beta$  (plasma membrane marker), caveolin (lipid raft marker), GM130 (Golgi marker), Bip/GR78 (ER marker), lamin A/C (nuclear marker),  $\alpha$ -tubulin (cytoplasmic marker), lamp-1 (lysosomal marker), or EEA1 (early endosomes marker). IB, immunoblotting.

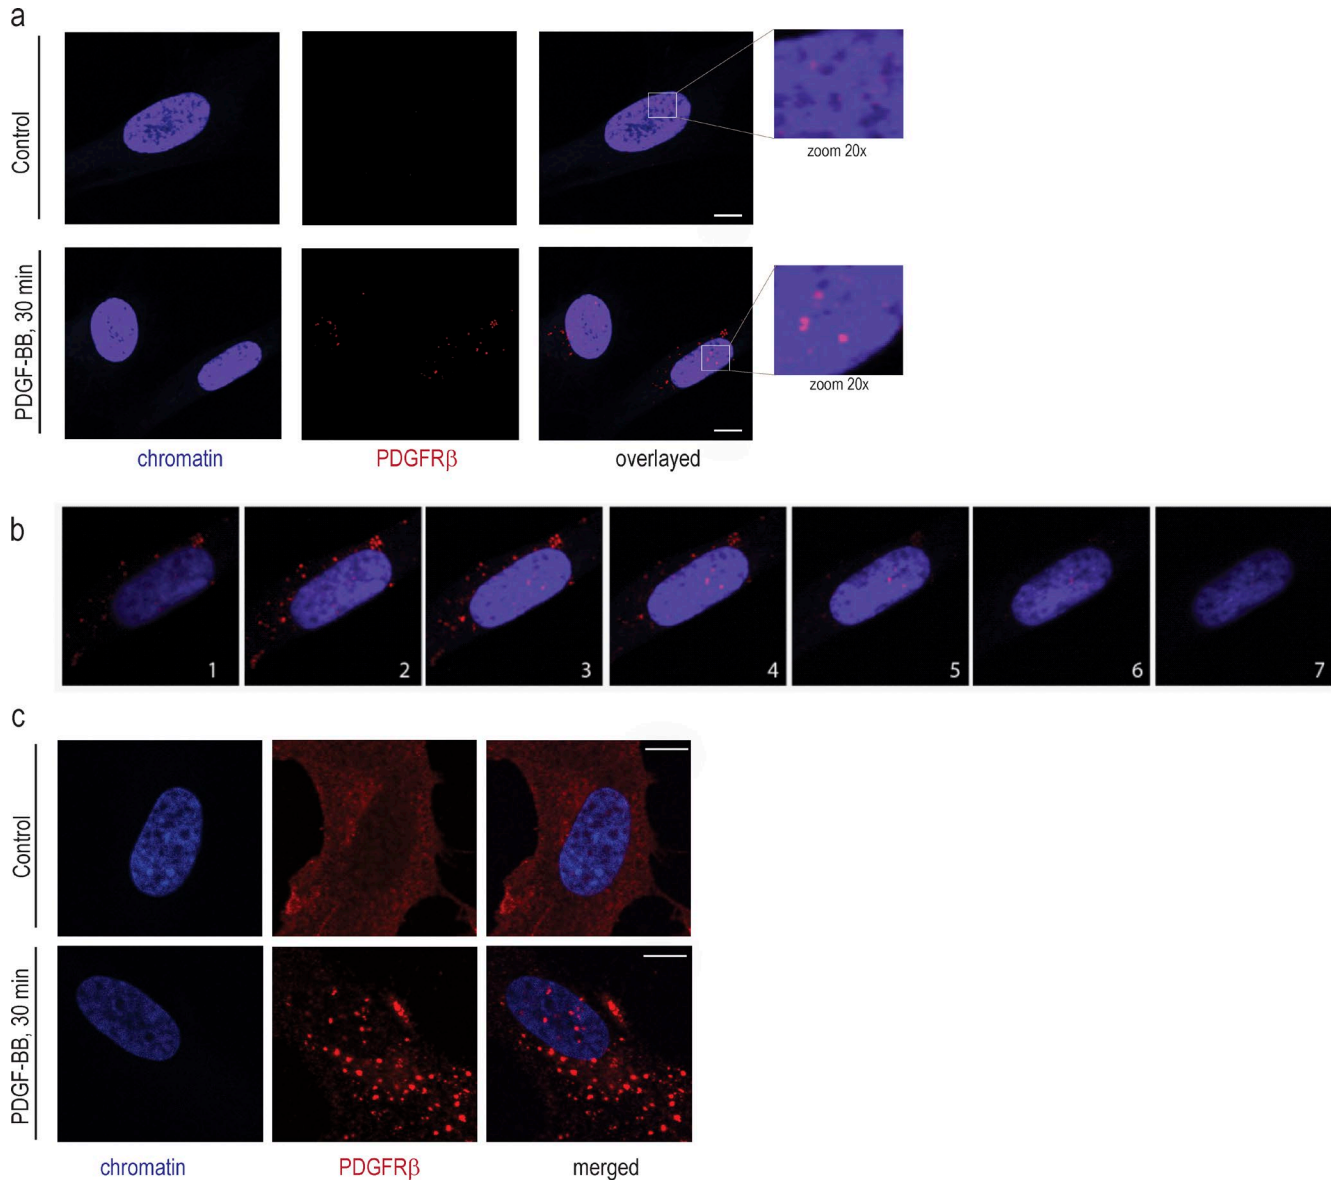

Figure S2. **Validation of nuclear localization of PDGFR $\beta$ .** (a) Immunofluorescence staining for PDGFR $\beta$  in the nucleus and cytoplasm. BJhTERT fibroblasts were stimulated (bottom) or not (top) with PDGF-BB and immunostained. PDGFR $\beta$  was stained with the rabbit intra-PDGFR $\beta$  antibody (red); chromatin was stained with DAPI (blue), and images were taken with the focus on the nucleus. After 30 min of PDGF-BB stimulation, dot-like clustering of PDGFR $\beta$  was observed in the cytoplasm, as well as throughout the nucleus (magnified images, shown on right). Bars, 10  $\mu$ m. (b) Z-stack images through the nucleus were taken of the cell, shown on the bottom of panel. Dot-like PDGFR $\beta$  staining in the nuclear area was most clearly seen when the objective was focused in the middle of the nucleus on levels 3–5, but not in images 1, 2, or 7 with a focus above and below the nucleus, respectively. (c) BJhTERT fibroblasts were stimulated with PDGF-BB (bottom) or not stimulated (top). PDGFR $\beta$  was stained with a goat extra-PDGFR $\beta$  antibody (red), and chromatin was stained with DAPI (blue). Images were analyzed by laser-scanning confocal microscopy. After 30 min of PDGF-BB stimulation, dot-like clustering of PDGFR $\beta$  was observed in the cytoplasm, as well as throughout the nucleus. Bars, 10  $\mu$ m.

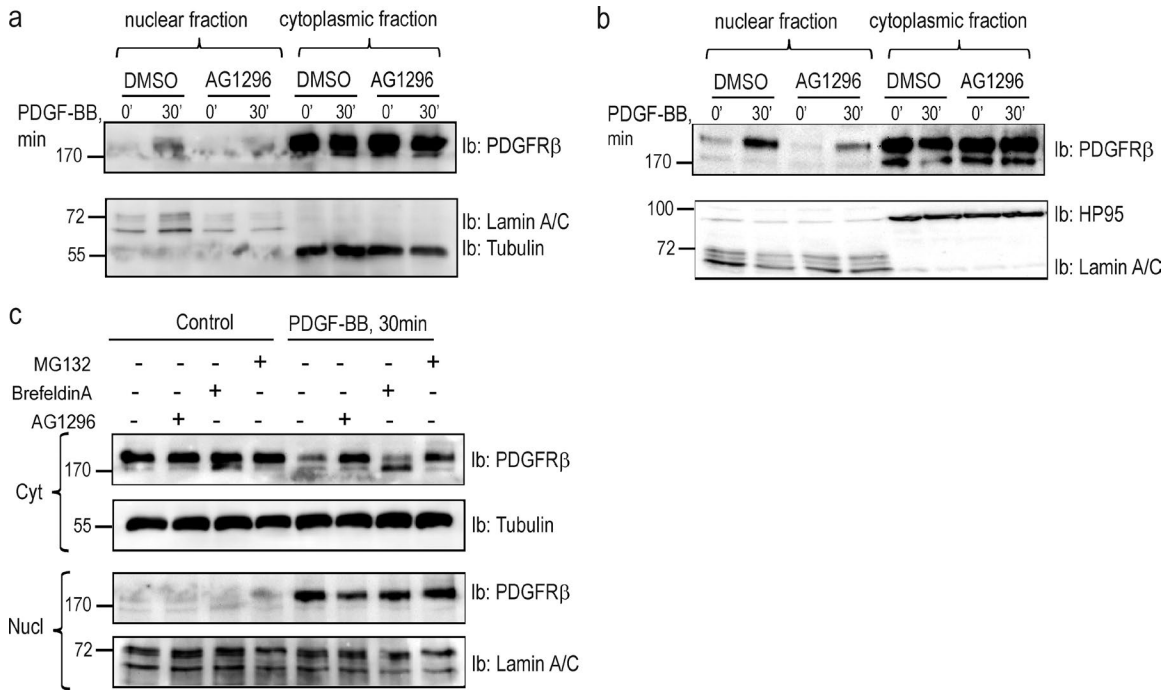

Figure S3. **Nuclear translocation of PDGFR occurs in both normal and cancer cell lines.** **(a)** Primary fibroblasts AG1523 were pretreated with the PDGFR $\beta$  tyrosine kinase inhibitor AG1296 (10  $\mu$ M) for 1 h or with vehicle (1  $\mu$ l DMSO/1 ml media). Cells were then stimulated with PDGF-BB, whereafter nuclear and cytoplasmic fractions were immunoblotted for total PDGFR $\beta$  or nuclear marker lamin C and cytoplasmic marker  $\alpha$ -tubulin. **(b)** Glioblastoma U105MG cells were pretreated with 10  $\mu$ M of AG1296 for 1 h or DMSO (as described above). Total PDGFR $\beta$  level was determined by immunoblotting (top); the purity of nuclear and cytoplasmic fractions was confirmed by blotting for the lamin A/C and cytoplasmic marker HP95 (Alix; bottom). **(c)** Osteosarcoma U2OS cells were pretreated with 25  $\mu$ M MG132 for 3 h, 500 ng/ml brefeldin A for 90 min, or 10  $\mu$ M AG1296 for 1 h. Cells were left unstimulated (first four lanes) or stimulated with 20 ng/ml PDGF-BB (last four lanes). Total PDGFR $\beta$  level was determined in the cytoplasmic (top) and nuclear (third panel) fractions; the purity of fractions was confirmed with immunoblotting for the cytoplasmic marker  $\alpha$ -tubulin (second panel) or the nuclear marker lamin C (bottom). Molecular mass was measured in kilodaltons. Ib, immunoblotting.
